# Supplementary material for: Dairy Products: A Potential Source of Multidrug-Resistant Enterococcus faecalis and Enterococcus faecium Strains
Source: MDPI journal article supplement (doi:10.3390/foods11244116), 2022-12-19
Supplement: s1 [file s1]

# Supplementary Materials

**Table S1.** Oligonucleotide primers used in this work.

| Genes                  | Sequence (5'–3')                                               | Annealing | Amplicon size (bp) | Reference |
|------------------------|----------------------------------------------------------------|-----------|--------------------|-----------|
| <i>ddl E. faecalis</i> | F: ATCAAGTACAGTTAGTCTT<br>R: ACGATTCAAAGCTAACTG                | 50        | 941                |           |
| <i>ddl E. faecium</i>  | F: GCAAGGCTTCTTAGAGA<br>R: CATCGTGTAAGCTAACTTC                 | 50        | 550                | [16]      |
| 16S                    | F: AGAGTTTGATCCTGGCTNAG<br>R: GACTACCNNGGTATCTAATCC            | 50        | 800                |           |
| <i>tet(L)</i>          | F: ATTACACTTCCGATTTTCGG<br>R: CATTGGTCTTATTGGTACG              | 54        | 1550               | [17]      |
| <i>VanA</i>            | F: AACAACTTACGCGGCACT<br>R: AAAGTGCGAAAAACCTTGC                | 55        | 1550               | [21]      |
| <i>ermB</i>            | F: GGAACATCTGTGGTATGGCG<br>R: CATTTAACGACGAAACTGGC             | 52        | 426                | [19]      |
| <i>VanB</i>            | F: GAT ATT CAA AGC TCC GCA GC<br>R: GGT ATC TTC CGC ATC CAT CA | 55        | 1000               | [22]      |
| <i>tet(M)</i>          | F: GTTAAATAGTGTTCTTGGAG<br>R: CTAAGATATGGCTCTAACAA             | 45        | 1500               | [17]      |
| <i>tet(W)</i>          | F: TGG TCC CCT AAT ACA TCG TT<br>R: GCC ATC TTG GTG ATC TCC    | 55        | 1550               | [18]      |
| <i>vgaA</i>            | F: AGT GGT GGT GAA GTA ACA CG<br>R: CTT GTC TCC TCC GCG AAT AC | 55        | 200                | [20]      |
| <i>vatD</i>            | F: GCT CAA TAG GAC CAG GTG TA<br>R: TCC AGC TAA CAT GTA TGG CG | 55        | 330                |           |
| <i>gelE</i>            | F: TATGACAATGCTTTTTGGGAT<br>R: AGATGCACCCGAAATAATATA           | 56        | 213                |           |
| <i>asa1</i>            | F: GCACGCTATTACGAACTATGA<br>R: TAAGAAAGAACATCACCACGA           | 56        | 375                |           |
| <i>esp</i>             | F: AGATTTTCATCTTTGATTCTTGG<br>R: AATTGATTCTTTAGCATCTGG         | 56        | 510                | [23]      |
| <i>cylA</i>            | F: ACTCGGGGATTGATAGGC<br>R: GCTGCTAAAGCTGCGCTT                 | 56        | 688                |           |
